# Supplementary material
Source: publisher figshare collection journal article supplement (https://tandf.figshare.com/ndownloader/files/16707830)
Supplement: Supplementary file 1 [file 16707830]

**E-supplement**


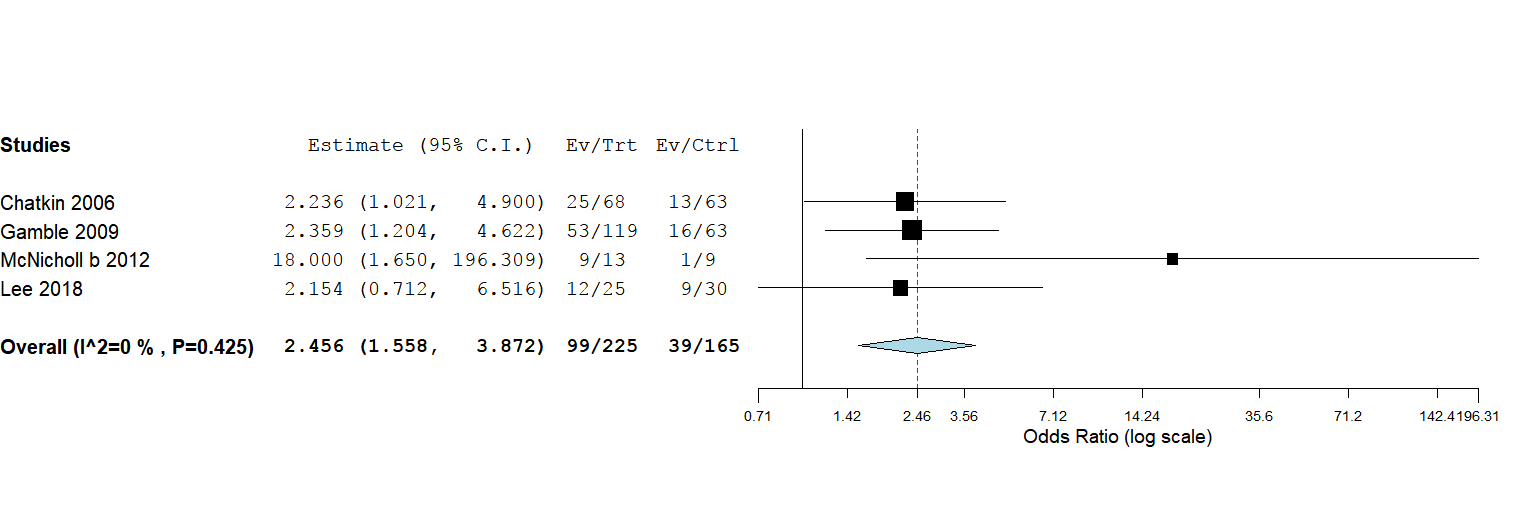


eFigure 1: Meta-analysis of unadjusted effects of male sex on adherence


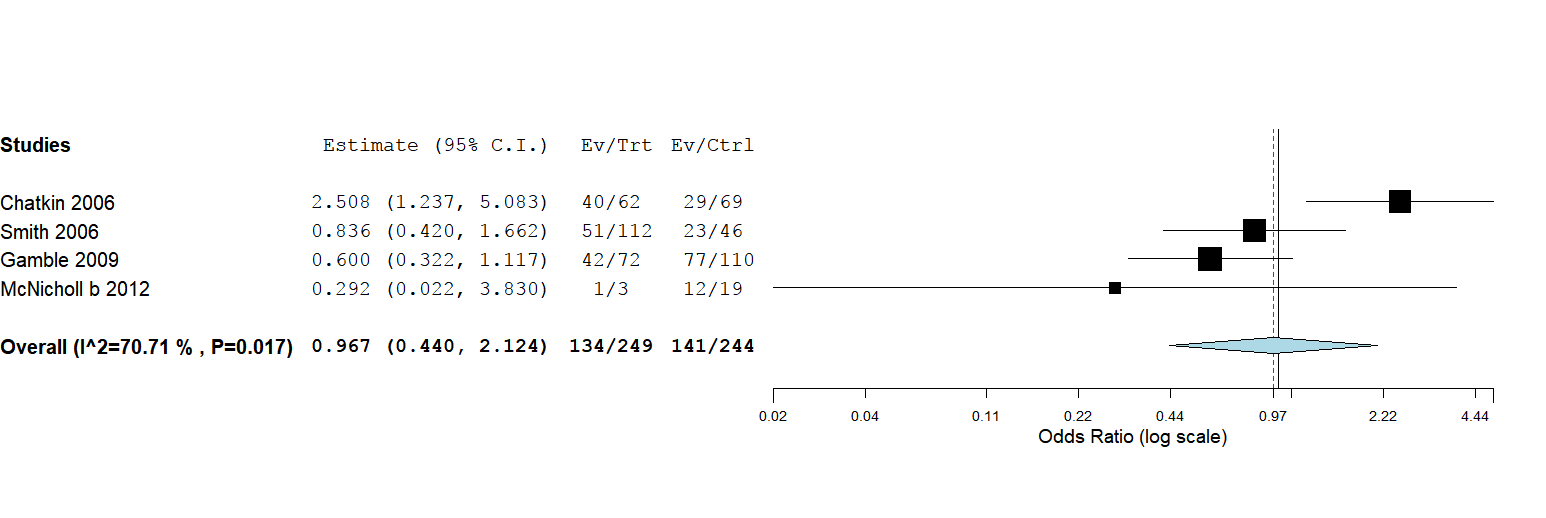


eFigure 2: Meta-analysis of unadjusted effects history of previous hospitalisation on adherence


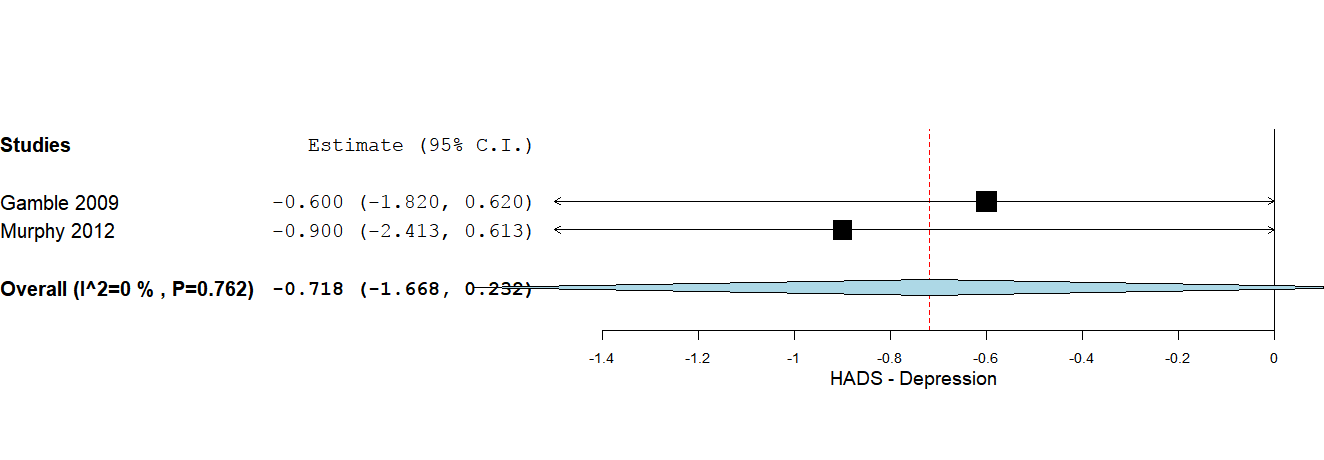


eFigure 3: Meta-analysis of mean difference of HADS-depression score according to adherence


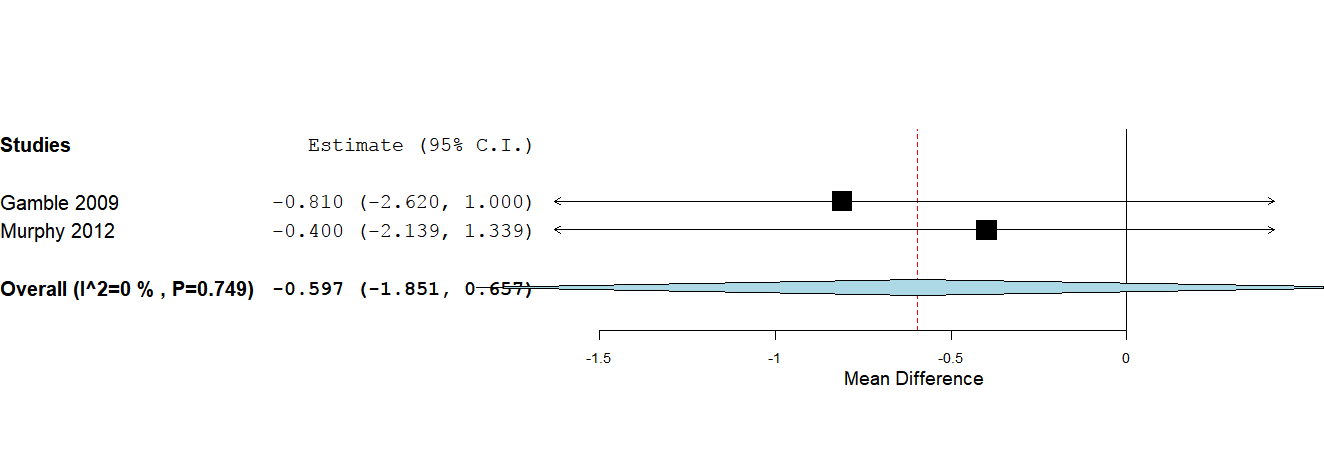


eFigure 4: Meta-analysis of mean difference of HADS-anxiety score according to adherence


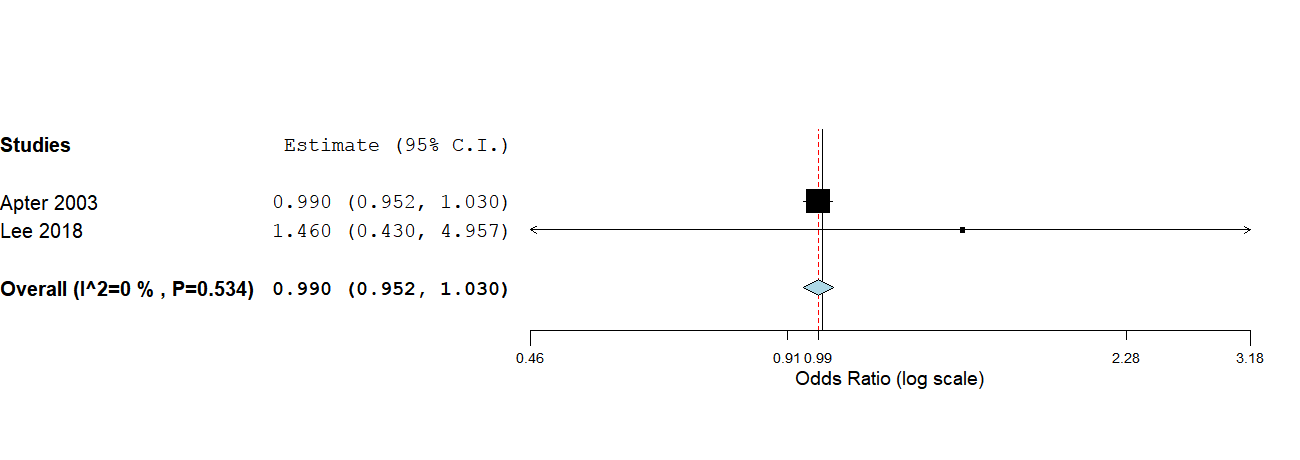


eFigure 5: Meta-analysis of unadjusted effects depressive symptoms on adherence


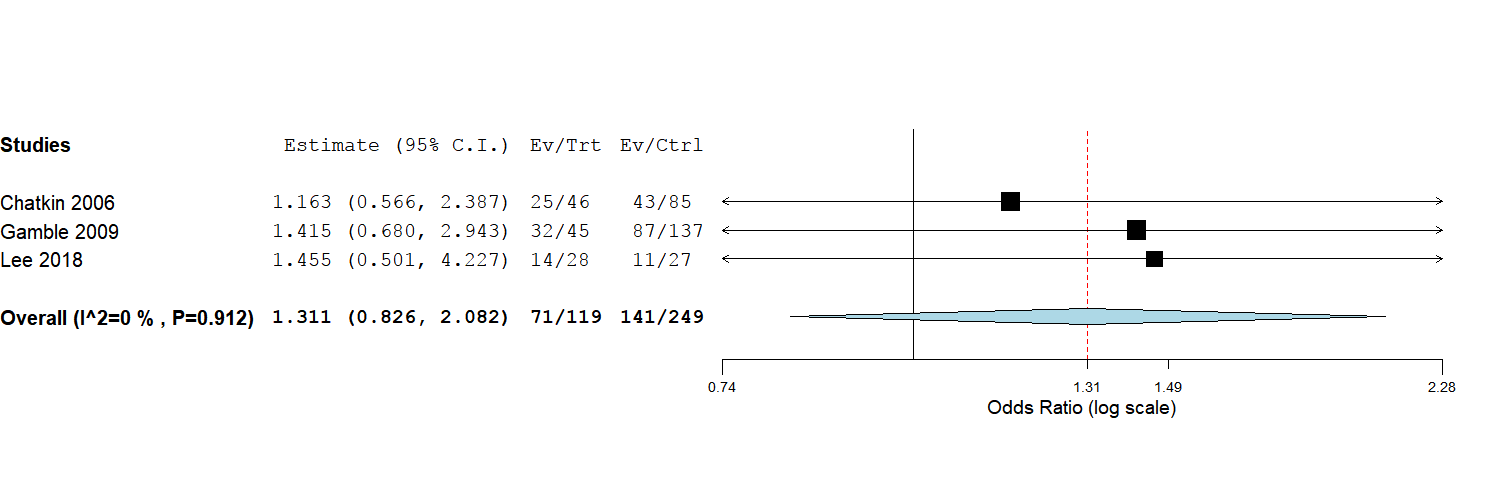


eFigure 6: Meta-analysis of unadjusted effects smoking history on adherence
